# Supplementary material for: Highly Efficient Production of MSTN-Edited Hu Sheep Mediated by the CBE System
Source: Research Square preprint supplement (doi:10.21203/rs.3.rs-6928613/v1), 2025-06-30
Supplement: Supplementary file 1 [file 15d01cca9fed4259ffa746e9.docx]

Supplemental materials

**List of the Supplemental figures and tables:**

**Supplemental Figure S1.** Sequencing identification of the pGL3-sgRNA expression vector.

**Supplemental Figure S2.** Genotyping of the sgM2 locus in *MSTN*-edited F1 generation Hu sheep.

**Supplemental table S1.** Oligo sequences of sgRNAs.

**Supplemental table S2.** Primers of in vitro transcription (IVT) templates.

**Supplemental table S3.** Primers for Editing detection.

**Supplemental table S4.** Individual level off target detection primers.


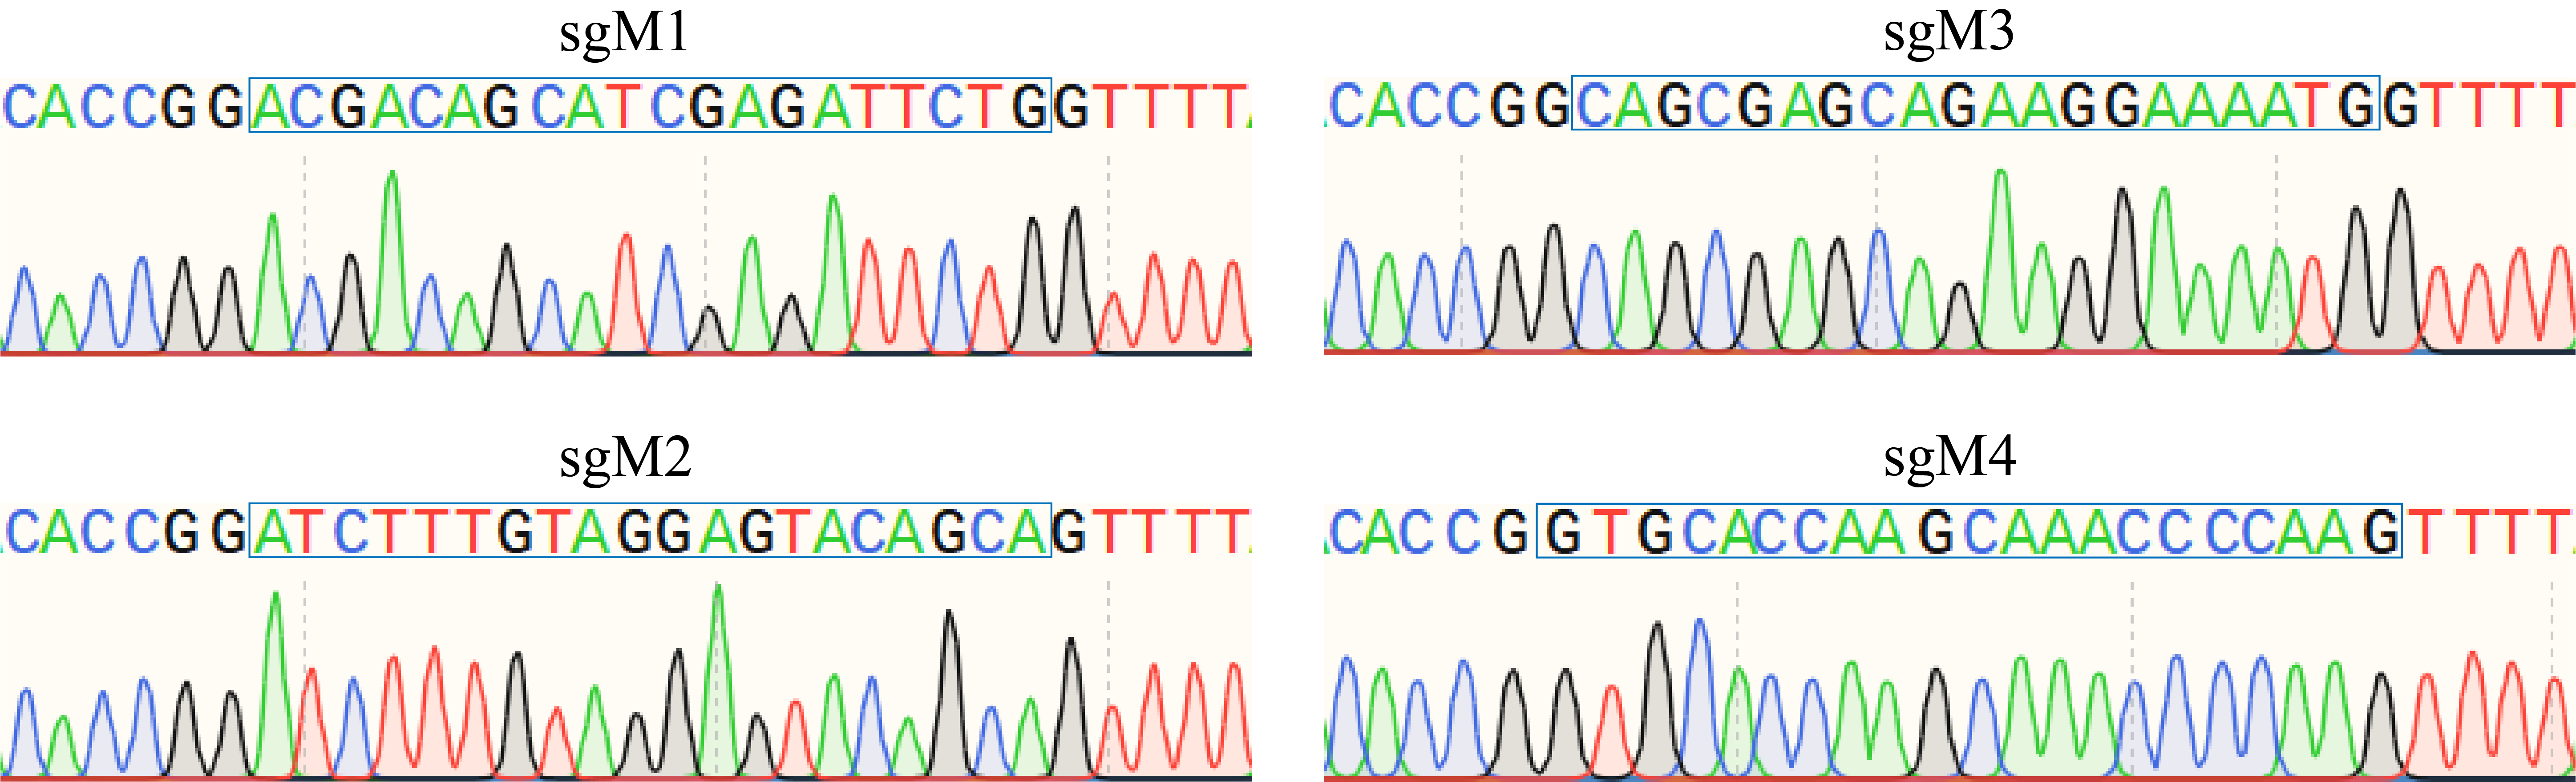


A


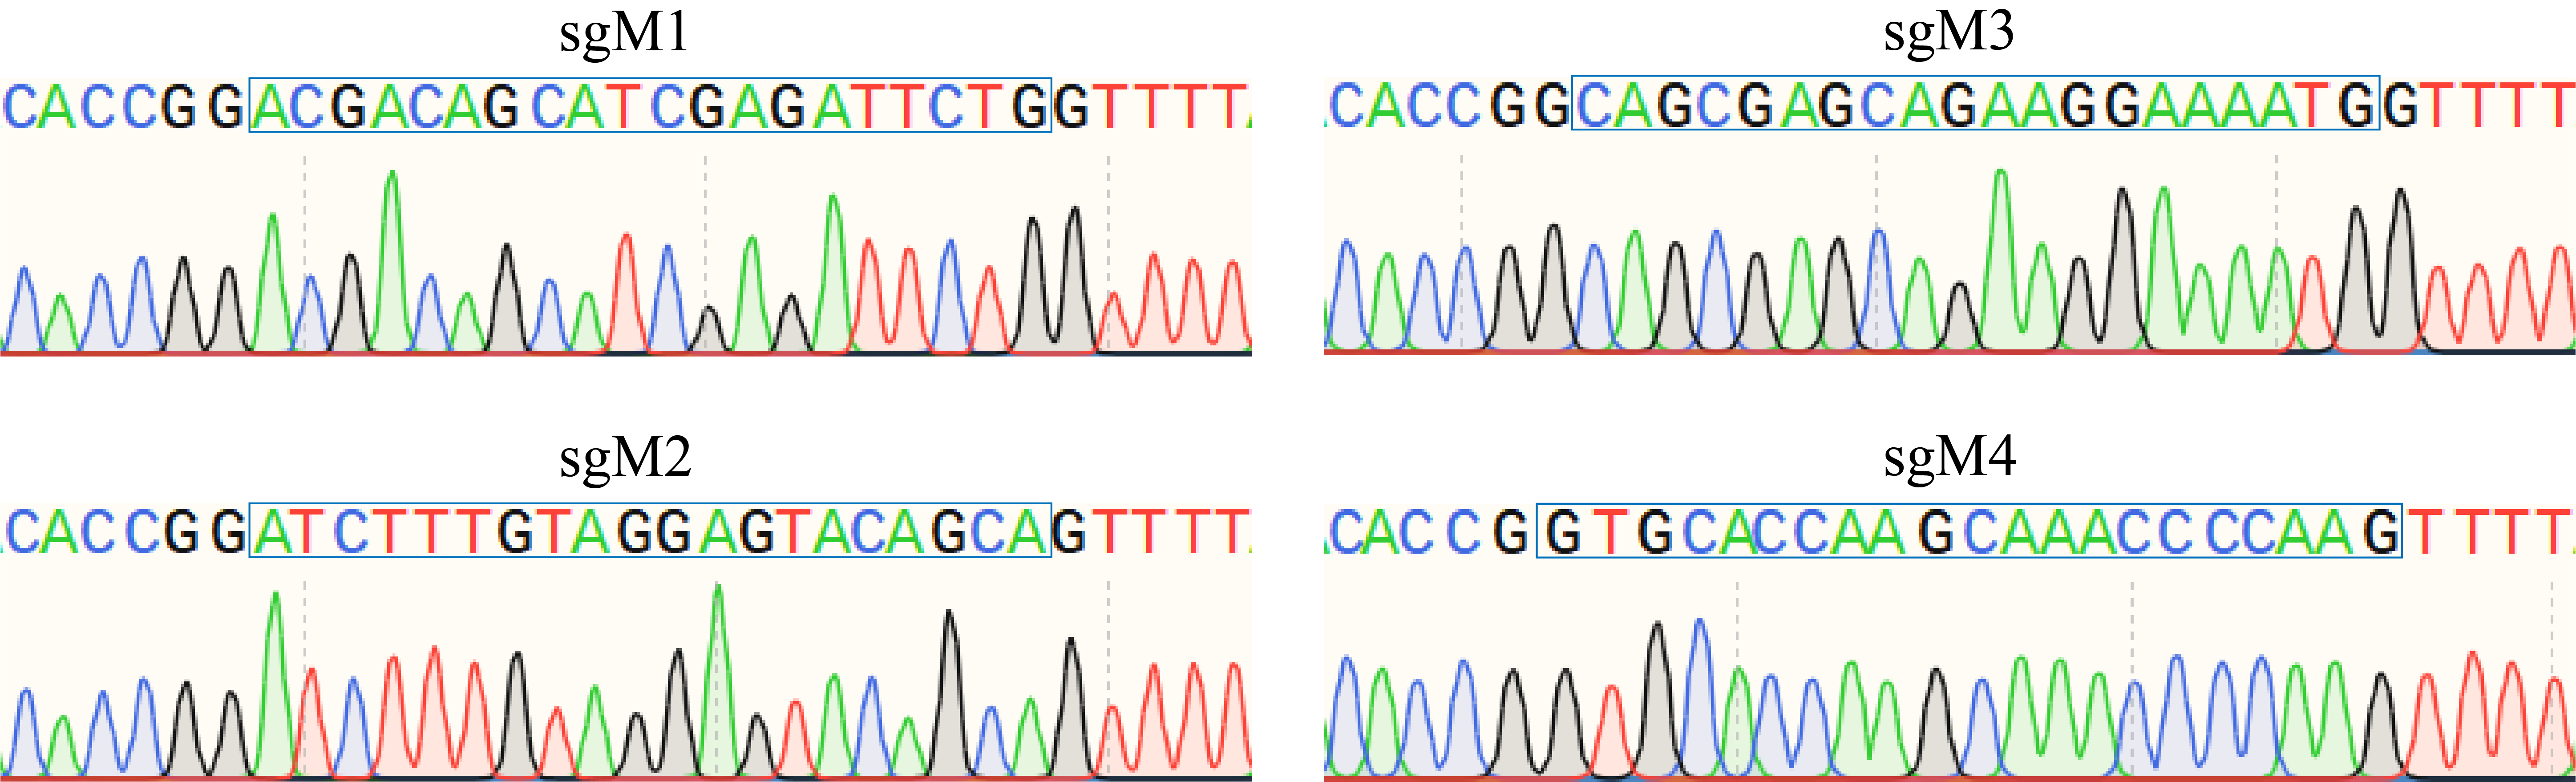


B

**Supplemental Figure S1. Sequencing identification of the pGL3-sgRNA expression vector.**

(A) Sequencing identification of the pGL3-sgM1 expression vector; (B) Sequencing identification of the pGL3-sgM2 expression vector.


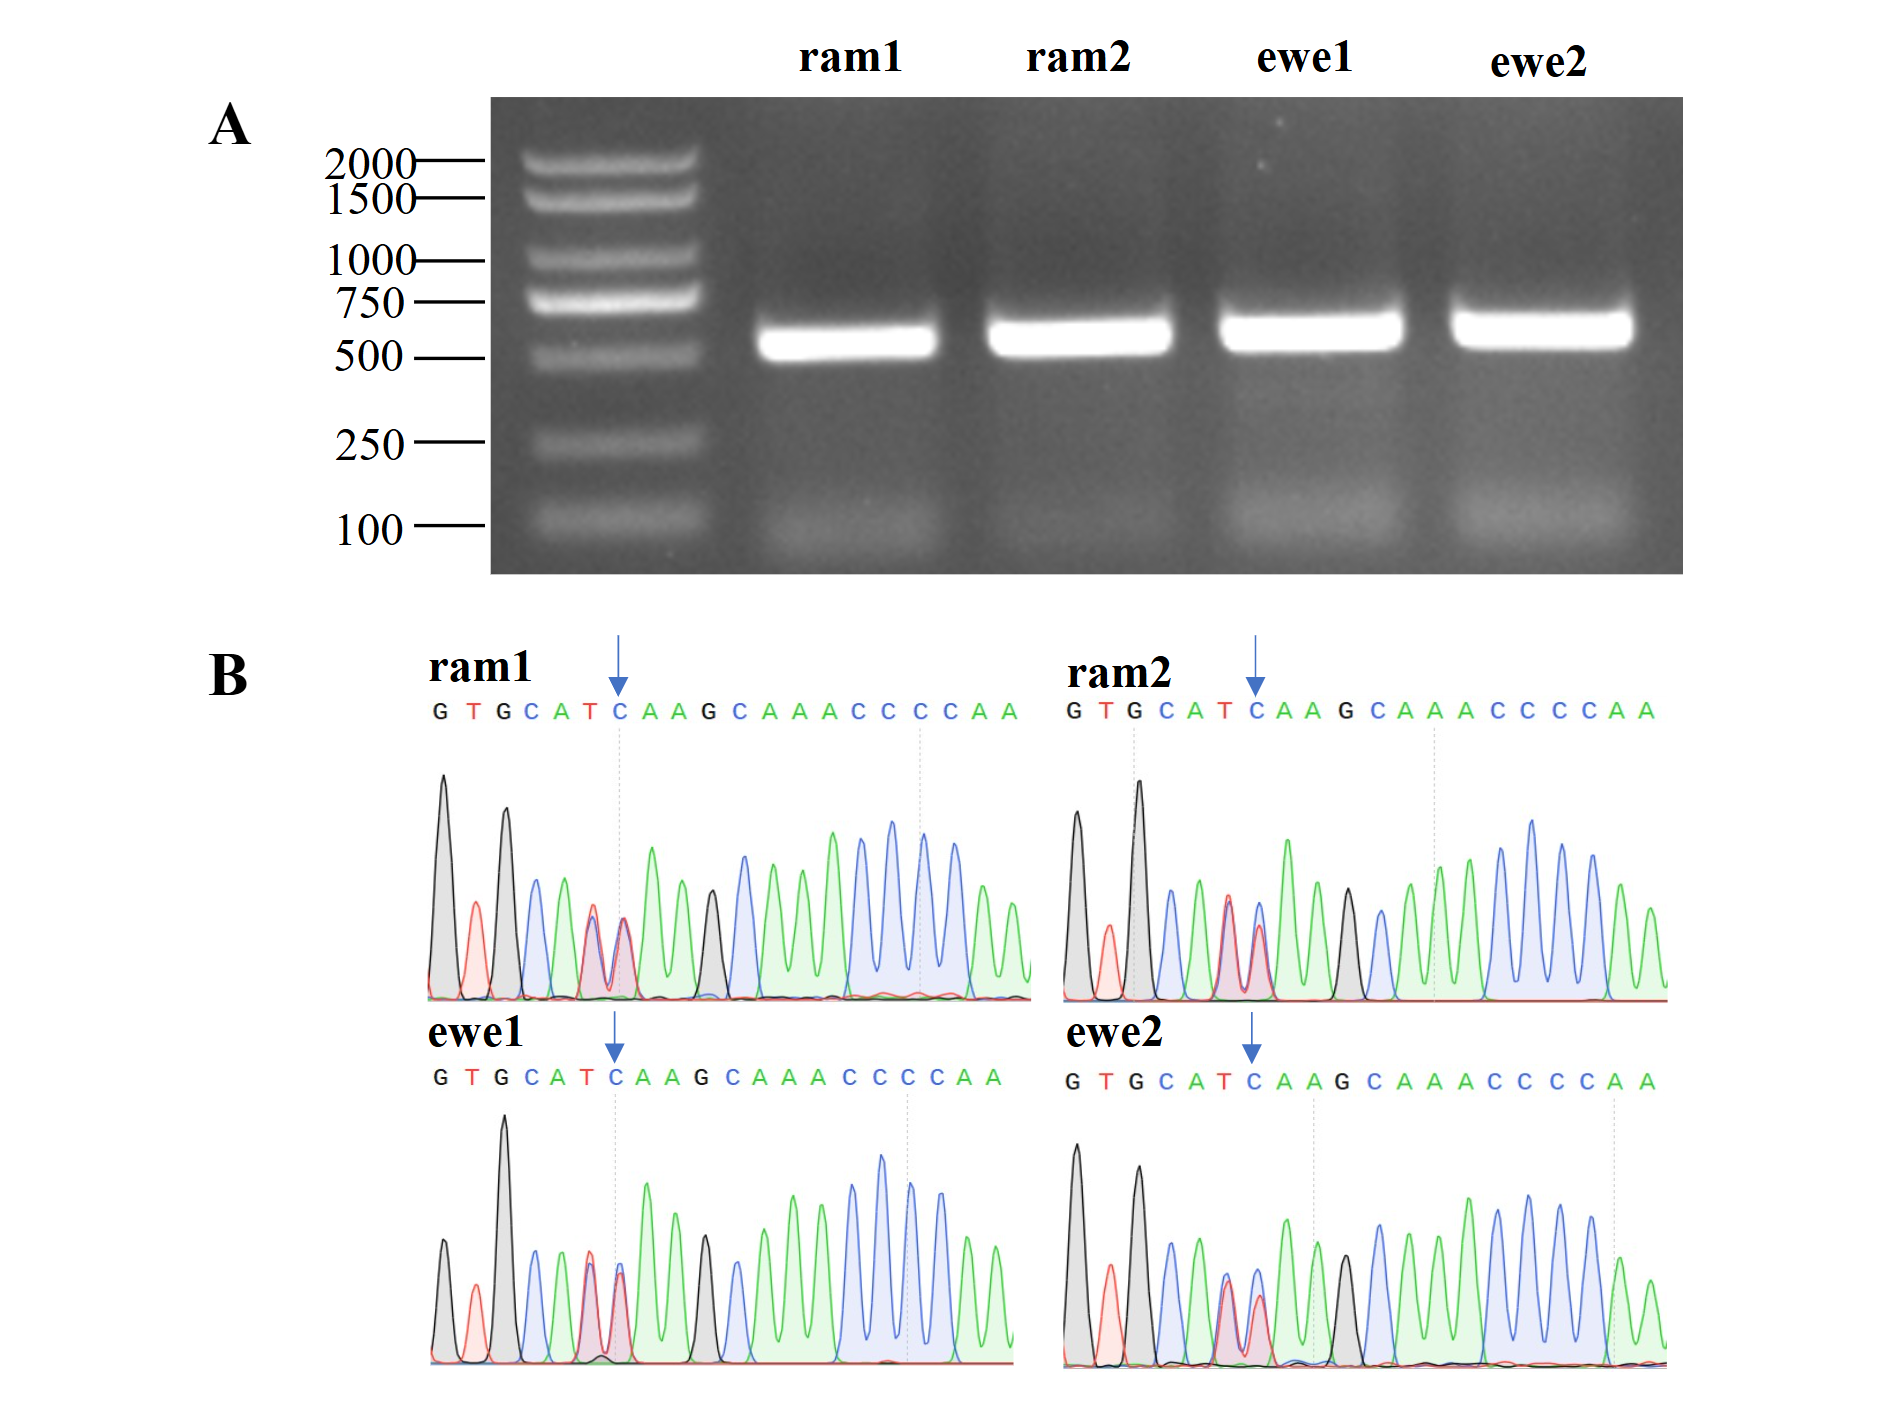


**Supplemental Figure S2.** Genotyping of the sgM2 locus in *MSTN*-edited F1 generation Hu sheep. (A) Amplification of the sgM2 locus region in *MSTN*-edited F1 generation Hu sheep. (B) Sequencing identification of the sgM2 locus region in *MSTN*-edited F1 generation Hu sheep.

**Supplemental table1. Oligo sequences of sgRNAs**

| Primers | Sequence (5’→3’) |
| --- | --- |
| sgRNA-M1(sgM1) | CAGCGAGCAGAAGGAAAATG***TGG*** |
| sgRNA-M2(sgM2) | GTGCACCAAGCAAACCCCAA***AGG*** |
| sgM1-F | caccgGCAGCGAGCAGAAGGAAAATG |
| sgM1-R | aaacCATTTTCCTTCTGCTCGCTGC |
| sgM2-F | caccgGTGCACCAAGCAAACCCCAA |
| sgM2-R | aaacTTGGGGTTTGCTTGGTGCAC |

**Supplemental table2. Primers of in vitro transcription (IVT) templates**

| IVT templates | IVT-Primers | Sequences（5’→3’） |
| --- | --- | --- |
| IVT-BE3 | IVT-BE3-F | taatacgactcactatagggGATCC |
| IVT-BE3-R | TCGAGGCTGATCAGGGGGTTTTTA |
| IVT-MSTN-sgM1 | IVT-MSTN-sgM1-F | ttaatacgactcactataggCAGCGAGCAGAAGGAAAATG |
| IVT-MSTN-sgM1-R | AAAAGCACCGACTCGGTGCC |
| IVT-MSTN-sgM2 | IVT-MSTN-sgM2-F | ttaatacgactcactatagGTGCACCAAGCAAACCCCAA |
| IVT-MSTN-sgM2-R | AAAAGCACCGACTCGGTGCC |

**Supplemental table3. Primers for Editing detection**

| Primers | Primer sequence (5’→3’) | Product size | Tm |
| --- | --- | --- | --- |
| sgM1-JC-F | AGCCAATCACAGATCCCGAC | 707 | 60 |
| sgM1-JC-R | TCTTTGCCCTCCTCCTTACG |
| sgM2-JC-F | GCAGGAAGACATAAGCTAGGC | 660 | 59 |
| sgM2-JC-R | TTGTAGGAGTACAGCAAGGGC |

**Supplemental table4. Individual level off target detection primers**

| Primer name | Primer sequence (5’→3’) | Product size | Tm |
| --- | --- | --- | --- |
| sgM2-OT1 | F:CTGCCTGCCAAAAACAAATTCT | 401 | 59 |
|  | R:CTCTGTCTGCTTTTGGTGGC |
| sgM2-OT2 | F:CACACCCACTGATGATGCCTA | 401 | 60 |
|  | R:ACTTCAGTTCCCCTTGTGCTT |
| sgM2-OT3 | F:CATCACAGACTGAAAACGGAA | 410 | 58 |
|  | R:GTGTAATACTGTAGCCCCGTC |
| sgM2-OT4 | F:CCACCACATGCCAGTTGCT | 471 | 60 |
|  | R:CTTGGGACAGGCTTTCACTC |
| sgM2-OT5 | F:AGGAACCTGGAAGGGAATC | 546 | 60 |
|  | R:CTCTGTTGCTGCGTGCTG |
